# Supplementary material for: Anti-hyperlipidemic and ameliorative effects of chickpea starch and resistant starch in mice with high fat diet induced obesity are associated with their multi-scale structural characteristics
Source: Royal Society of Chemistry journal article supplement (doi:10.1039/d1fo04354d), 2022-01-01
Supplement: d1fo04354d1.pdf [file d1fo04354d1.pdf]

**Table S1.** Detailed composition information for the experimental diets.

| <b>Macronutrients</b>  |  | <b>D12450B</b> |      |              | <b>D12451</b> |            |      |              |
|------------------------|--|----------------|------|--------------|---------------|------------|------|--------------|
|                        |  | <b>gm%</b>     |      | <b>Kcal%</b> |               | <b>gm%</b> |      | <b>Kcal%</b> |
| Protein                |  | 19.2           |      | 20           |               | 24         |      | 20           |
| Carbohydrate           |  | 67.3           |      | 70           |               | 41         |      | 35           |
| Fat                    |  | 4.3            |      | 10           |               | 24         |      | 45           |
| Total (Kcal/gm)        |  |                | 3.85 |              |               |            | 4.73 |              |
| <b>Ingredient</b>      |  | <b>gm%</b>     |      | <b>Kcal%</b> |               | <b>gm%</b> |      | <b>Kcal%</b> |
| Casein, 80 Mesh        |  | 200            |      | 800          |               | 200        |      | 800          |
| L-Cystine              |  | 3              |      | 12           |               | 3          |      | 12           |
| Corn Starch            |  | 315            |      | 1260         |               | 72.8       |      | 291          |
| Maltodextrin 10        |  | 35             |      | 140          |               | 100        |      | 400          |
| Sucrose                |  | 350            |      | 1400         |               | 172.8      |      | 691          |
| Cellulose, BW200       |  | 50             |      | 0            |               | 50         |      | 0            |
| Soybean Oil            |  | 25             |      | 225          |               | 25         |      | 225          |
| Lard*                  |  | 20             |      | 180          |               | 177.5      |      | 1598         |
| Mineral Mix S10026     |  | 10             |      | 0            |               | 10         |      | 0            |
| Dicalcium Phosphate    |  | 13             |      | 0            |               | 13         |      | 0            |
| Calcium Carbonate      |  | 5.5            |      | 0            |               | 5.5        |      | 0            |
| Potassium Citrate,1H2O |  | 16.5           |      | 0            |               | 16.5       |      | 0            |
| Vitamin Mix V1001      |  | 10             |      | 40           |               | 10         |      | 40           |
| Choline Bitartrate     |  | 2              |      | 0            |               | 2          |      | 0            |
| FD&C Yellow Dye #5     |  | 0.05           |      | 0            |               | 0          |      | 0            |
| FD&C Red Dye #40       |  | 0              |      | 0            |               | 0.05       |      | 0            |
| <b>Total</b>           |  | 1055.05        |      | 4057         |               | 858.15     |      | 4057         |

**Table S2.** Primers for PCR analysis of gene expression.

| Genes | Forward Primer         | Reverse Primer          |
|-------|------------------------|-------------------------|
| FAS   | GGCTGCAGTGAATGAATTTG   | TTCGTACCTCCTTGGCAAAC    |
| LDLR  | GGGAGTTTGGCTCCAGAGTTT  | TGTGTCTTCAGGGGTCCTTAG   |
| ACC1  | GCCATCCGGTTTGTGTCA     | GGATACCTGCAGTTTGAGCCA   |
| DGAT2 | GCGCTACTTCCGAGACTACTT  | GGGCCTTATGCCAGGAAACT    |
| HSL   | CCTGGCAAGCCTCATCGTC    | AGCAGCCCGGCTAGTAGTAG    |
| ATGL  | TCCGTGGCTGTCTACTAAAGA  | TGGGATATGATGACGTTCTCTCC |
| GLP-1 | CTGGTGGAAGGCGTGTATCTAT | TGGAAGGAAGTGAAGGAGAGTT  |
| PYY   | ACCTCCATCTCCTCCTGCT    | CTCTGGTTTGGCAGGGTAGG    |
| GAPDH | CGTCCCGTAGACAAAATGGT   | TTGATGGCAACAATCTCCAC    |
